# Supplementary material
Source: PubMed Central journal article supplement (PMC6768754)

## Treatment schedule

---Neo-Adjuvant

- CT of chest and MRI of abdomen on week 8, planning for SRT
- Pre-op restaging on week 16
- CT (chest, abdomen, pelvis) with contrast: baseline, pre-surgery, prior to restart chemo after surgery, EOS, every 3m of FU

Arm1&2  
shared

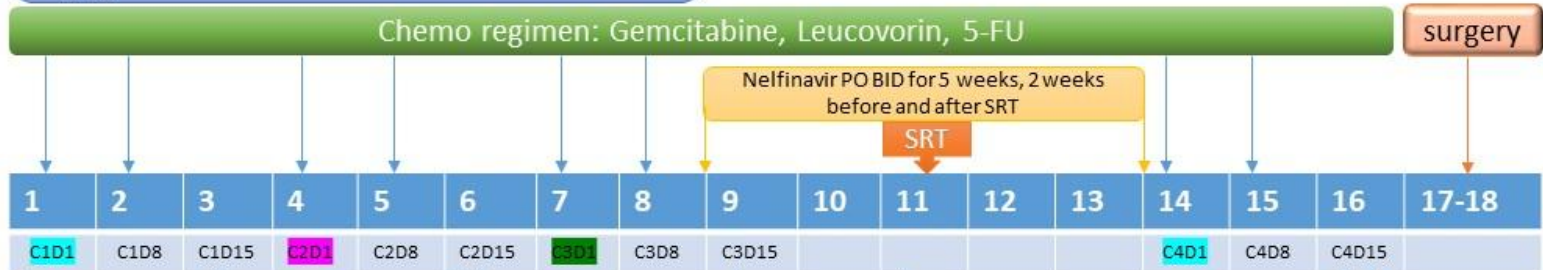

Arm1  
Only

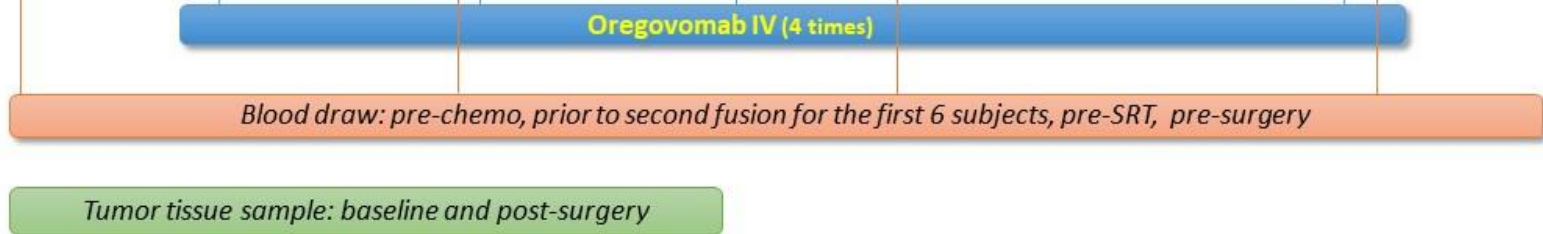

Supplement: NIHMS1537892-supplement-Supplemental_Figure_1.pdf [file NIHMS1537892-supplement-Supplemental_Figure_1.pdf]
